# Supplementary material for: Volatile Fatty Acids (VFA) Production and Recovery from Chicken Manure Using a High-Solid Anaerobic Membrane Bioreactor (AnMBR)
Source: MDPI journal article supplement (doi:10.3390/membranes12111133), 2022-11-11
Supplement: s1 [file s1]

Supplementary Materials

# Volatile Fatty Acids (VFA) Production and Recovery from Chicken Manure Using a High-Solid Anaerobic Membrane Bioreactor (AnMBR)

Dong Min Yin <sup>1,2,3</sup>, Clarisse Uwineza <sup>1</sup>, Tugba Salmaz <sup>1</sup>, Amir Mahboubi <sup>1</sup>, Heleen De Wever <sup>4</sup>, Wei Qiao <sup>2</sup> and Mohammad J. Taherzadeh <sup>1,\*</sup>

<sup>1</sup> Swedish Centre for Resource Recovery, University of Borås, 501 90 Borås, Sweden

<sup>2</sup> Biomass Engineering Center, College of Engineering, China Agricultural University, Beijing 100083, China

<sup>3</sup> Institute of Urban and Rural Mining, Changzhou Key Laboratory of Biomass Green, Safe & High Value Utilization Technology, Changzhou University, Changzhou 213164, China

<sup>4</sup> Flemish Institute for Technological Research, VITO NV, Boeretang 200, B-2400 Mol, Belgium

\* Correspondence: mohammad.taherzadeh@hb.se; Tel.: +46-033-435-5908

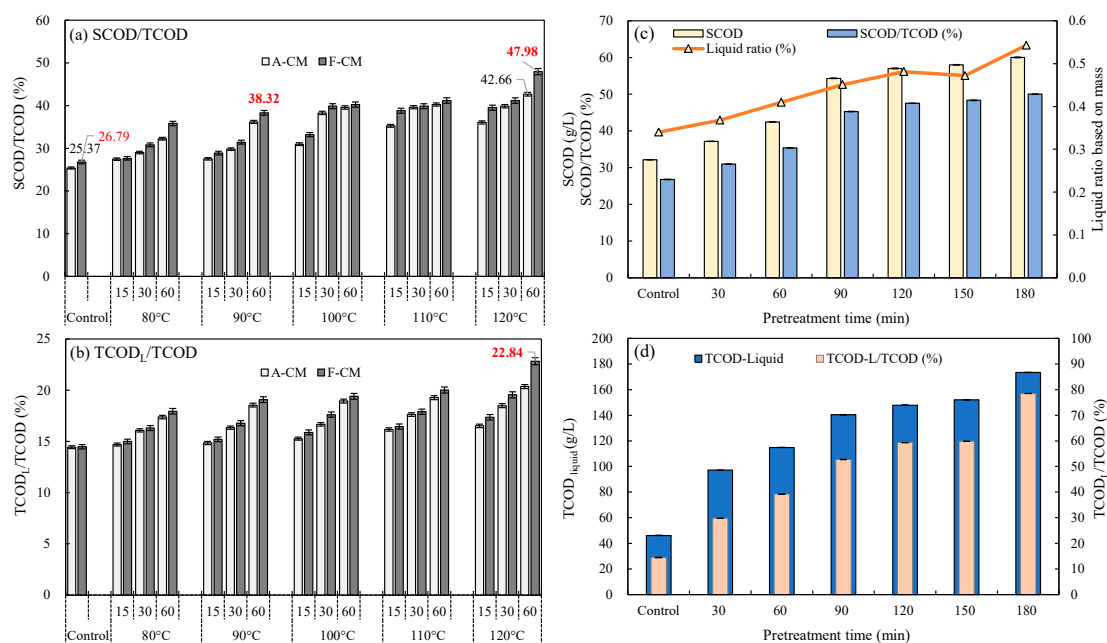

**Figure S1.** Hydrolysis efficiencies of chicken manure with thermal pretreatment under different temperature and time.

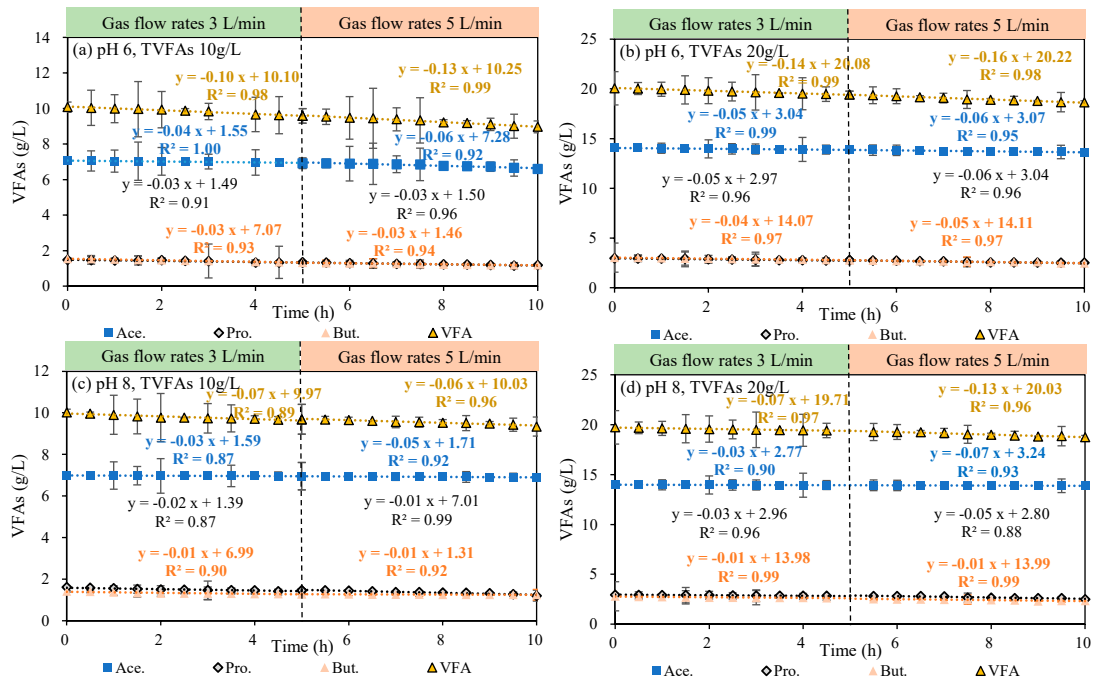

**Figure S2.** VFAs evaporation liner fit for different conditions of pH, N<sub>2</sub> flowing rates and initial VFAs concentration.

**Table S1.** VFAs evaporation test during different conditions of pH, N<sub>2</sub> flowing rates and initial VFAs concentration.

|                |      | pH 6.0  |       |         |       | pH 8.0  |       |         |       |
|----------------|------|---------|-------|---------|-------|---------|-------|---------|-------|
| Gas Flow Rates |      | 3 L/min |       | 5 L/min |       | 3 L/min |       | 5 L/min |       |
|                |      | $k_1$   | $R^2$ | $k_2$   | $R^2$ | $k_1$   | $R^2$ | $k_2$   | $R^2$ |
| TVFA 10<br>g/L | Ace. | -0.04   | 0.93  | -0.06   | 0.92  | -0.03   | 0.90  | -0.05   | 0.99  |
|                | Pro. | -0.03   | 0.91  | -0.03   | 0.96  | -0.02   | 0.87  | -0.01   | 0.92  |
|                | but. | -0.03   | 1.00  | -0.03   | 0.94  | -0.01   | 0.87  | -0.01   | 0.92  |
|                | VFA  | -0.10   | 0.98  | -0.13   | 0.99  | -0.07   | 0.89  | -0.06   | 0.95  |
| TVFA 20<br>g/L | Ace. | -0.05   | 0.99  | -0.06   | 0.97  | -0.03   | 0.99  | -0.07   | 0.93  |
|                | Pro. | -0.05   | 0.97  | -0.06   | 0.96  | -0.03   | 0.96  | -0.05   | 0.88  |
|                | Ibu. | -0.04   | 0.96  | -0.05   | 0.95  | -0.01   | 0.90  | -0.01   | 0.99  |
|                | VFA  | -0.14   | 0.99  | -0.16   | 0.98  | -0.07   | 0.97  | -0.12   | 0.96  |

Notes: (1) The total volatile fatty acids (TVFA) consisted of acetate: propionate: butyrate = 7:1.5:1.5;  
 (2)  $k$  means the evaporated coefficient under different conditions, g/(L·h).
